# Supplementary material for: Nearly perfect GaN crystal via pit-assisted growth by HVPE
Source: Royal Society of Chemistry journal article supplement (doi:10.1039/c7ce00246g), 2017-01-01
Supplement: c7ce00246g1.pdf [file c7ce00246g1.pdf]

## Electronic supplementary information

### Nearly perfect GaN crystal via pit-assisted growth by HVPE

Moonsang Lee,<sup>a</sup> Dmitry Mikulik,<sup>b</sup> Mino Yang,<sup>c</sup> and Sungsoo Park<sup>d,e\*</sup>

<sup>a</sup> Korea Basic Science Institute, 162 Yeongudanjiro, Ochang, Cheongju, Chungbuk  
28119, Republic of Korea

<sup>b</sup>Laboratory of Semiconductor Materials, Ecole Polytechnique Fédérale de Lausanne  
1015, Lausanne, Switzerland

<sup>c</sup> Seoul center, Korea Basic Science Institute, Anam-dong 5-ga, Seongbuk-gu, Seoul 136-  
713, Republic of Korea

<sup>d</sup>Department of Science Education, Jeonju University, 303 Cheonjam-ro, Wansan-gu,  
Jeollabuk-do, Republic of Korea

<sup>e</sup>Analytical Lab. of Advanced Ferroelectric Crystals, Jeonju University, 303 Cheonjam-ro,  
Wansan-gu, Jeollabuk-do, Republic of Korea

Corresponding Author: \*sspark@jj.ac.kr

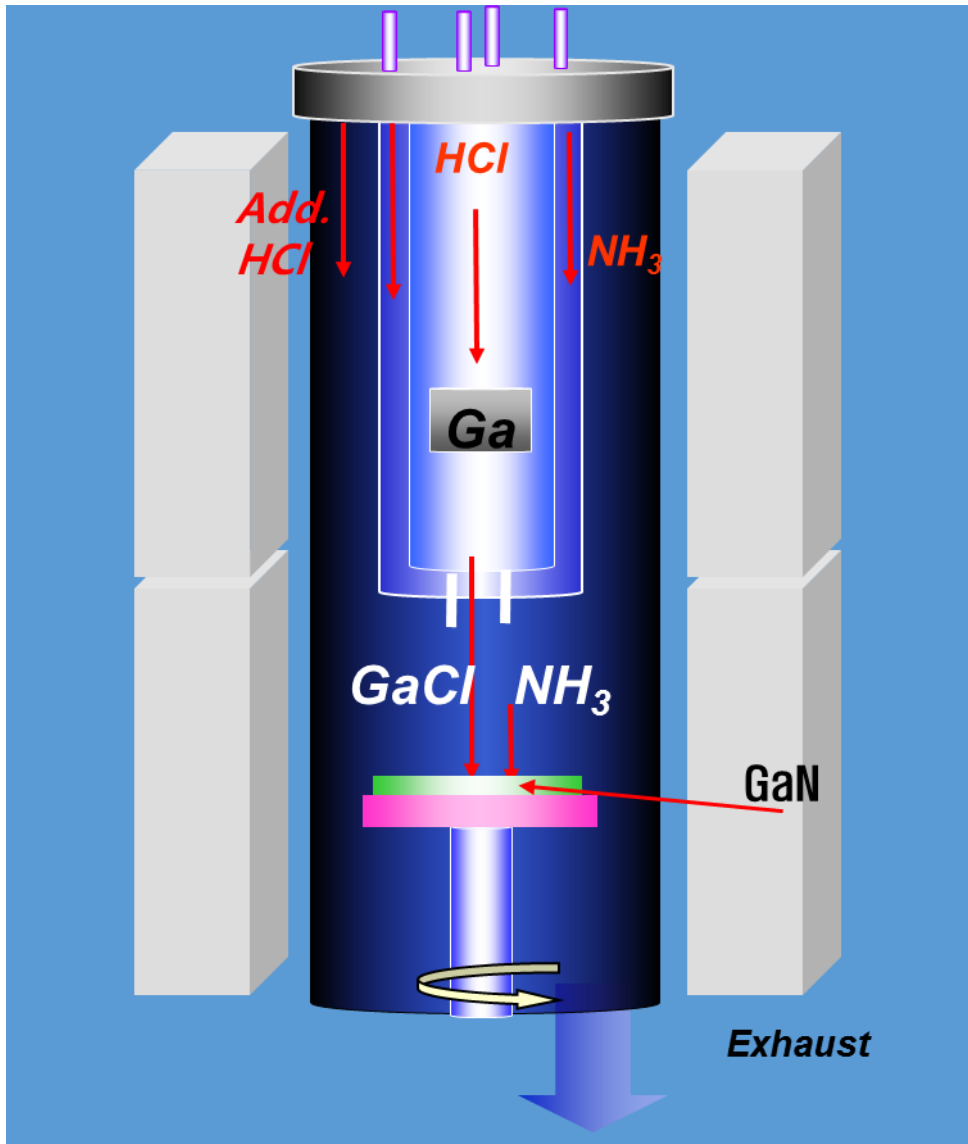

**Fig. S1** Schematic diagram of home-made vertical-type hot wall HVPE reactor

| HCl etching time (min) | HCl (1000 °C, 300 sccm)                                                            | HCl → H <sub>3</sub> PO <sub>4</sub> (160 °C, 5 min)                                | HCl → H <sub>3</sub> PO <sub>4</sub> (160 °C, 15 min)                                |
|------------------------|------------------------------------------------------------------------------------|-------------------------------------------------------------------------------------|--------------------------------------------------------------------------------------|
| 5                      | 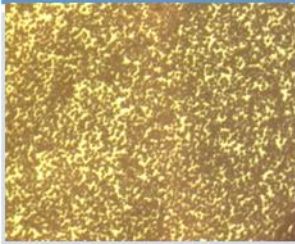  |   |   |
| 10                     |   |   |   |
| 20                     |  |  |  |

**Fig. S2** Optical microscopy images of surface of the freestanding GaN as a function of HCl etching time, and H<sub>3</sub>PO<sub>4</sub> etching time

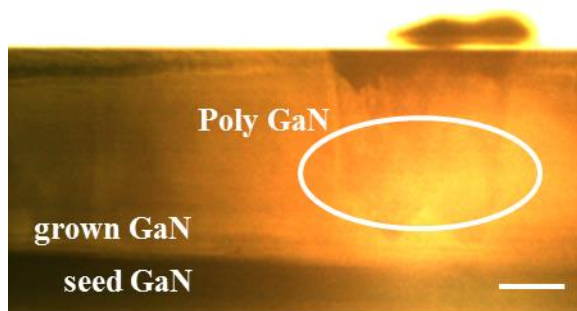

(a)

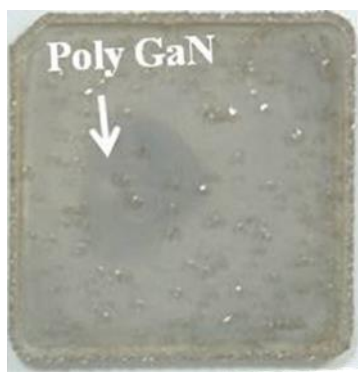

(b)

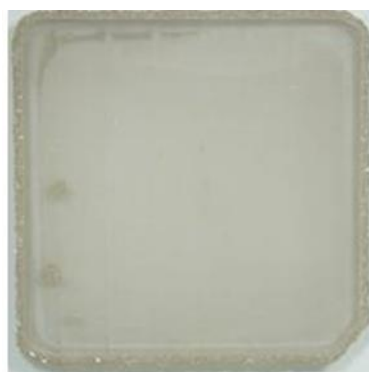

(c)

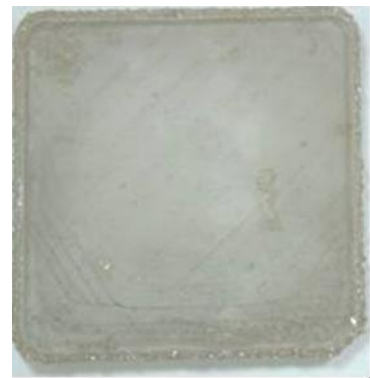

(d)

**Fig. S3** (a) Cross sectional stereo microscopy image of bulk GaN crystal with 2 mm in thickness. The scale bar is 500  $\mu\text{m}$ . Surface images of bulk GaN grown with additional HCl flow rate of (b) 0 sccm, (c) 40 sccm, and (d) 100 sccm. The size of bulk GaN is 10 mm x 10 mm.
